# Supplementary figures and images for: Dipeptidyl Peptidase 1 Inhibitor AZD7986 Induces a Sustained, Exposure‐Dependent Reduction in Neutrophil Elastase Activity in Healthy Subjects
Source: PubMed Central journal article supplement — Clin Pharmacol Ther. 2018 Apr 16;104(6):1155–64. doi: 10.1002/cpt.1053 (PMC6282495; doi:10.1002/cpt.1053), 2018-04-16

# Geometric mean absolute neutrophil count after repeated dosing

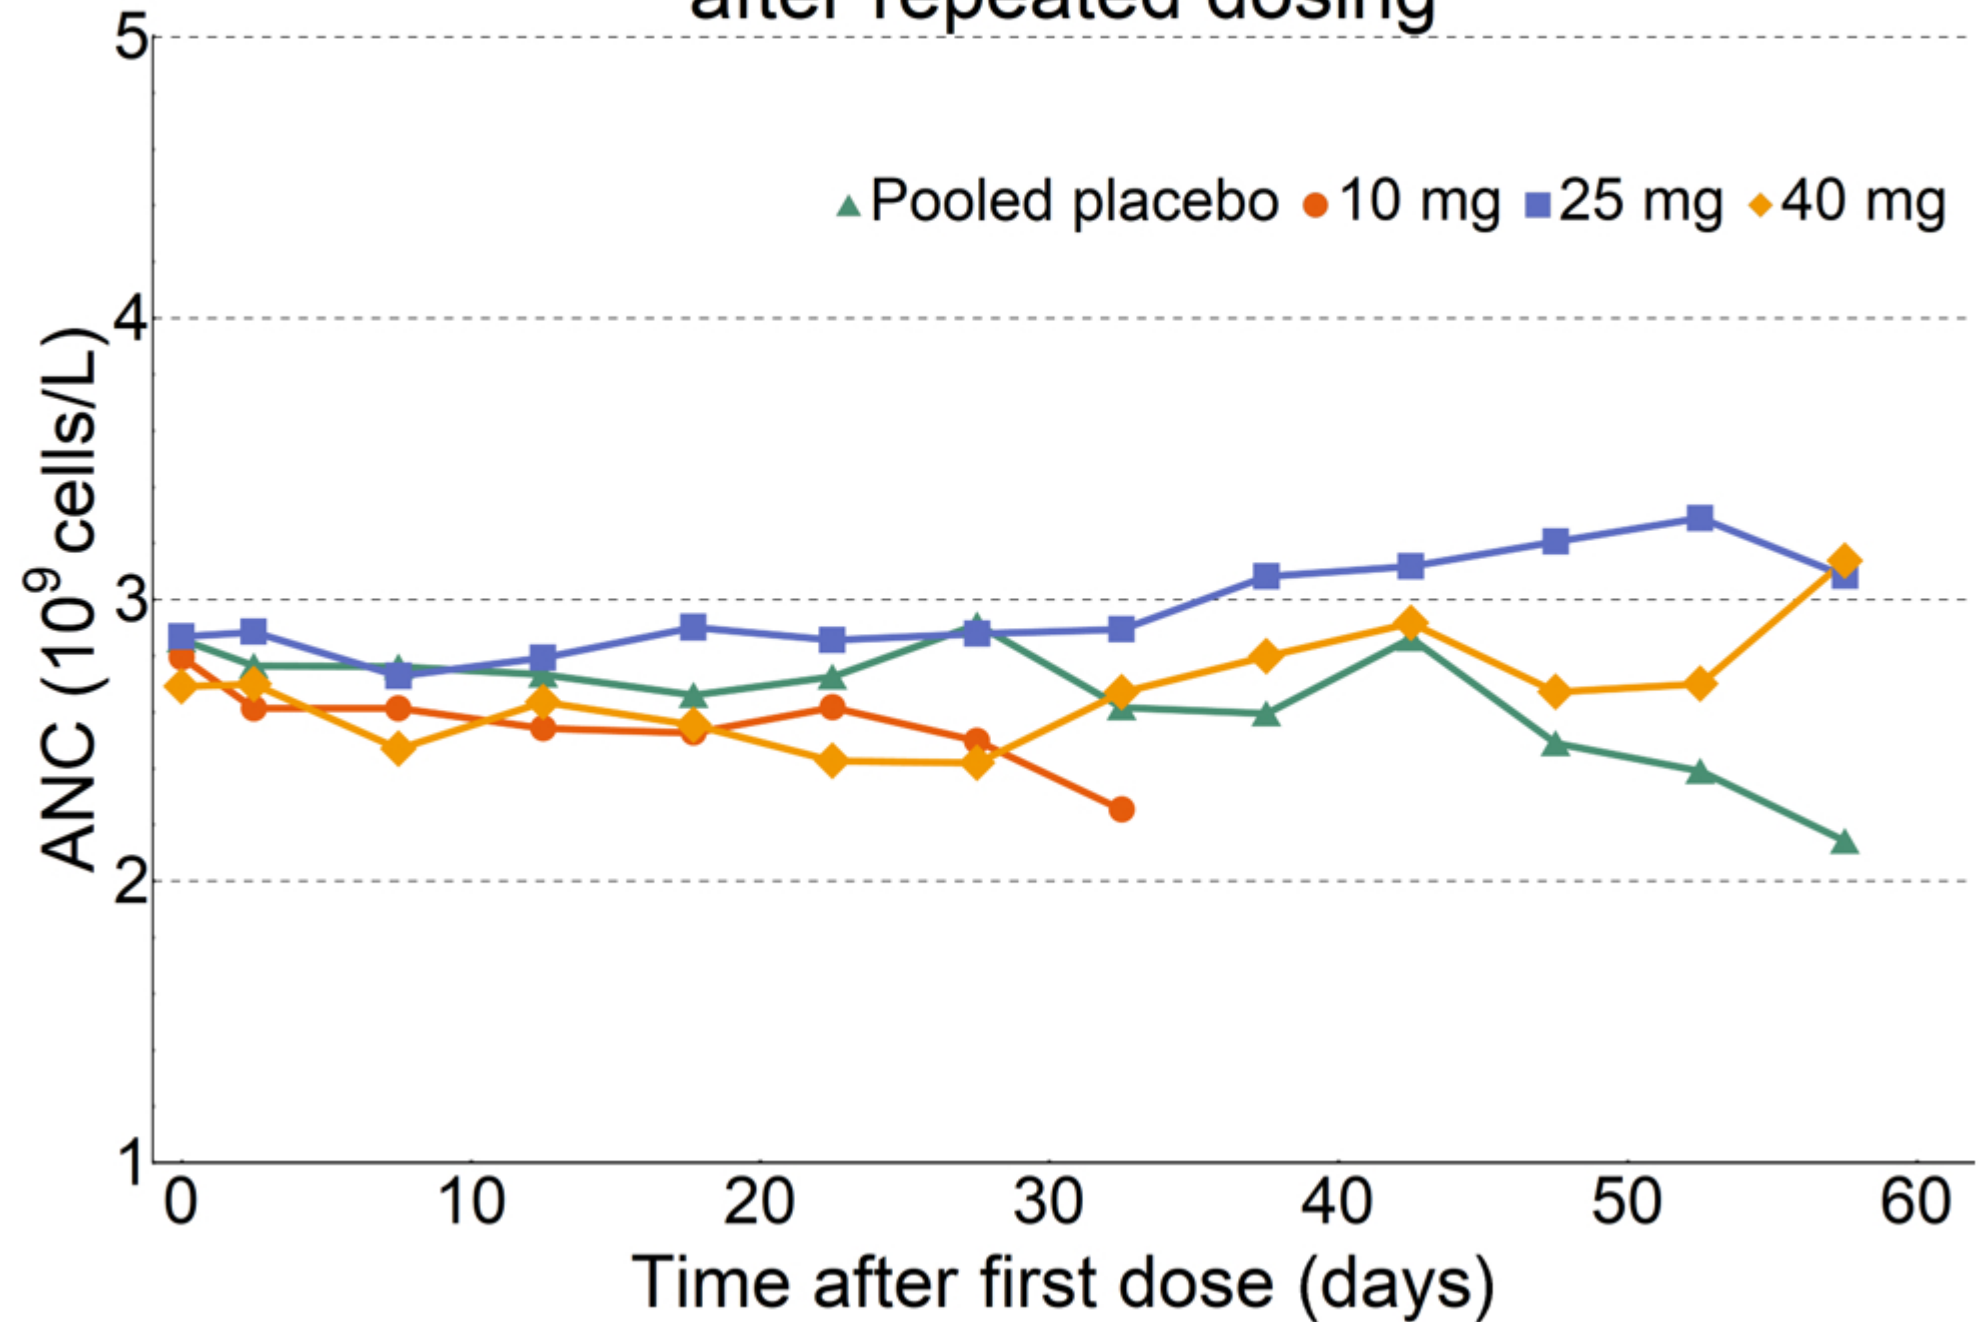

Supplement: CPT-104-1155-s001.pdf [file CPT-104-1155-s001.pdf]

Objective function value vs. number of compartments

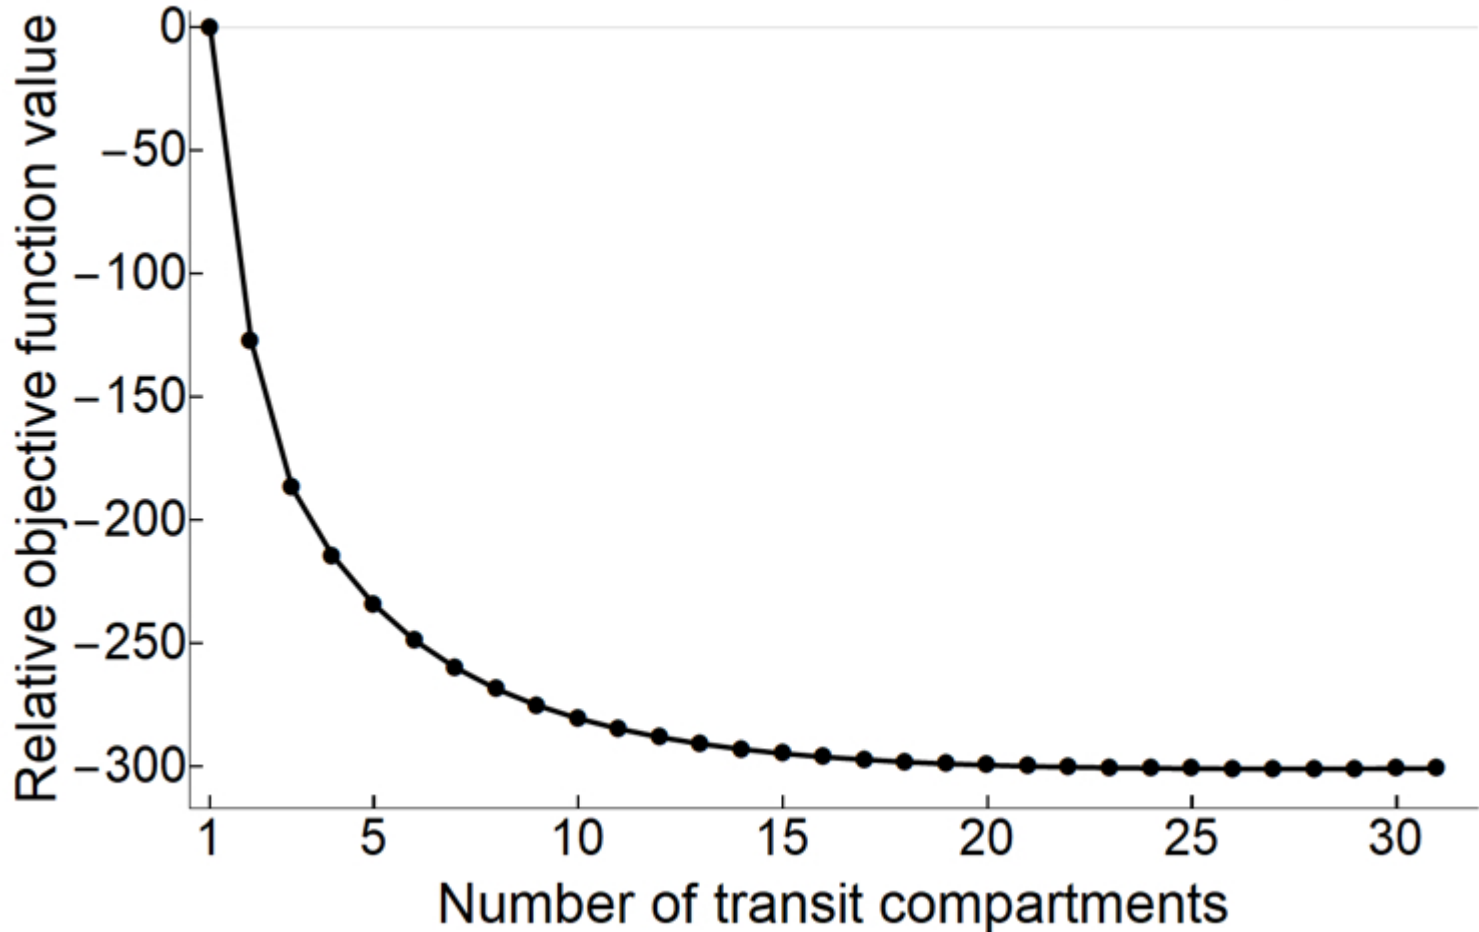

Supplement: CPT-104-1155-s002.pdf [file CPT-104-1155-s002.pdf]

**A**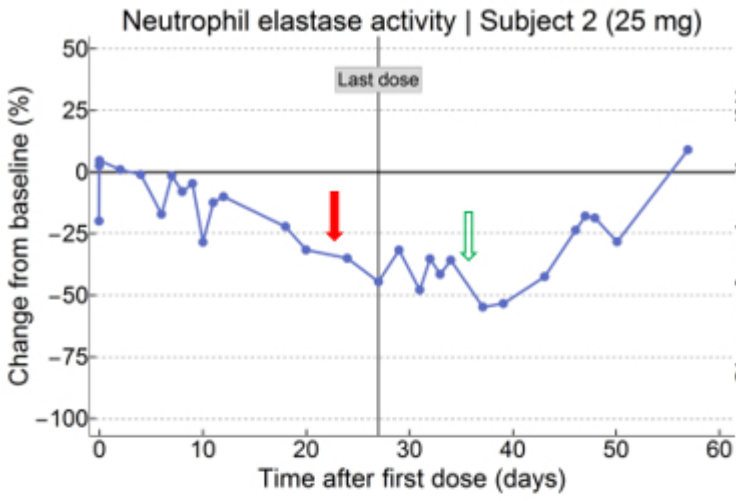**B**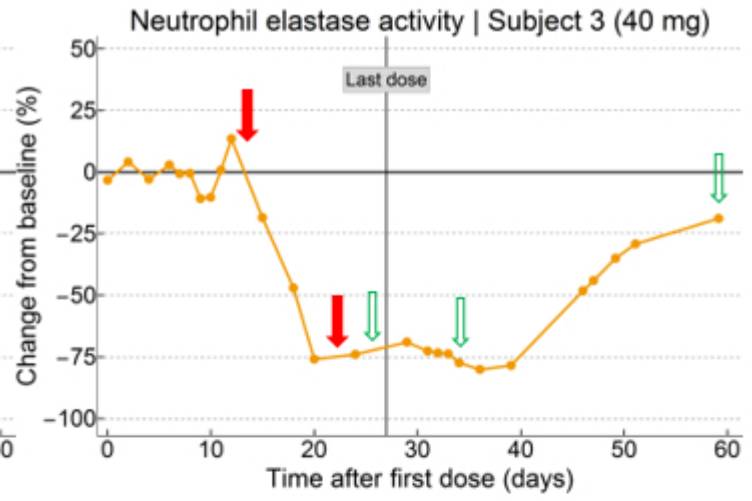**C**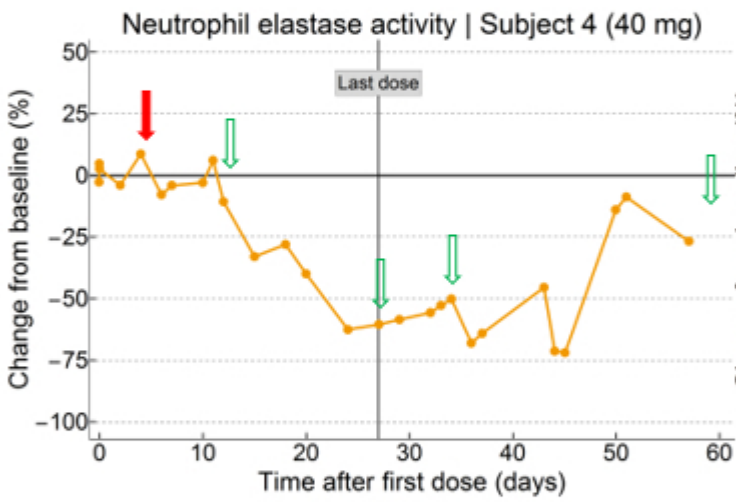**D**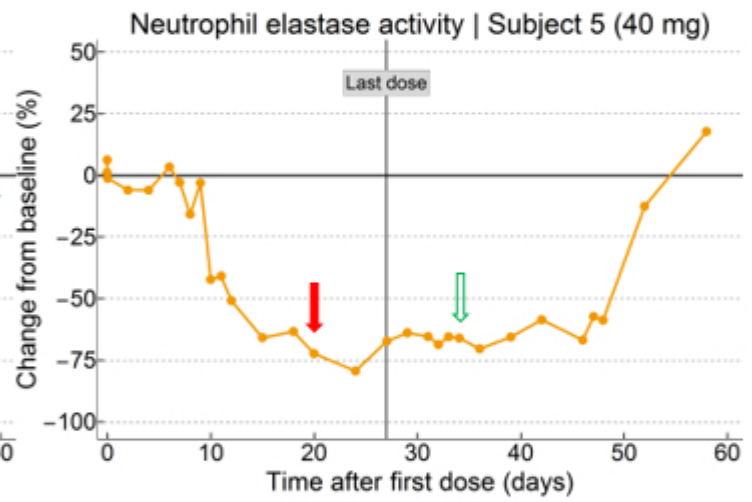**E**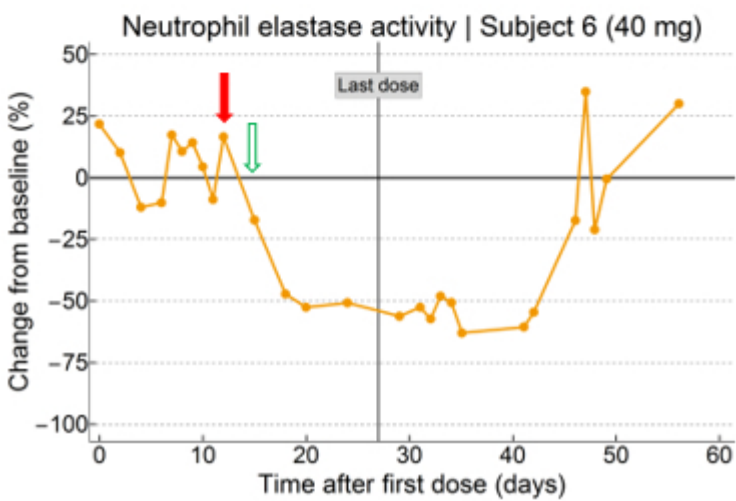

Supplement: CPT-104-1155-s003.pdf [file CPT-104-1155-s003.pdf]
